# Supplementary material for: Hydrocortisone-induced parkin prevents dopaminergic cell death via CREB pathway in Parkinson’s disease model
Source: PubMed Central journal article supplement (PMC5428870; doi:10.1038/s41598-017-00614-w), 2017-04-03
Supplement: 41598_2017_614_MOESM1_ESM.pdf [file 41598_2017_614_MOESM1_ESM.pdf]

## **Supporting Information**

### **Hydrocortisone-induced parkin prevents dopaminergic cell death via CREB pathway in Parkinson's disease model**

Sangwoo Ham, Yun-Il Lee, Minkyung Jo, Hyojung Kim, Hojin Kang, Areum Jo, Gum Hwa Lee, Yun Jeong Mo, Sang Chul Park, Yun Song Lee, Joo-Ho Shin, and Yunjong Lee

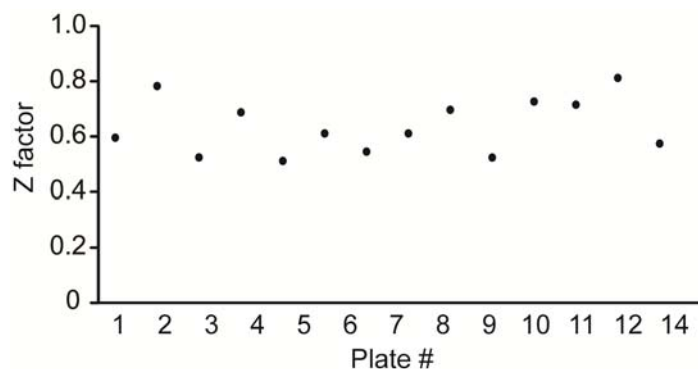

**Figure S1. Z' factor of the high-throughput screening method of this study.**

Scatter plot of Z' factor of each 96-well plate used in the high-throughput luciferase screening. Z' factors were calculated per each plate using values of means (M) and standard deviations (SD) from negative (DMSO) and positive control (10  $\mu$ M, CCCP).  $Z' = 1 - 3(SD_{\text{CCCP}} + SD_{\text{DMSO}}) / (M_{\text{CCCP}} - M_{\text{DMSO}})$ .

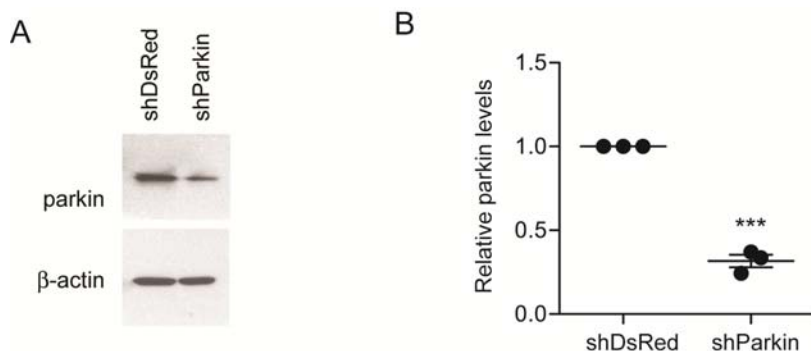

**Figure S2. Efficient knockdown of parkin by shRNA.**

(A) Efficient knockdown of parkin by transfecting shRNA specific to parkin in SH-SY5Y cells determined by western blot using indicated antibodies.  $\beta$ -actin was used as an internal loading control. (B) Relative parkin expression levels in SH-SY5Y cells transfected with shRNA to parkin were normalized to  $\beta$ -actin ( $n = 3$ ). Quantified data are expressed as mean  $\pm$  s.e.m. \*\*\* $P < 0.001$ , unpaired two-tailed Student's  $t$  test.

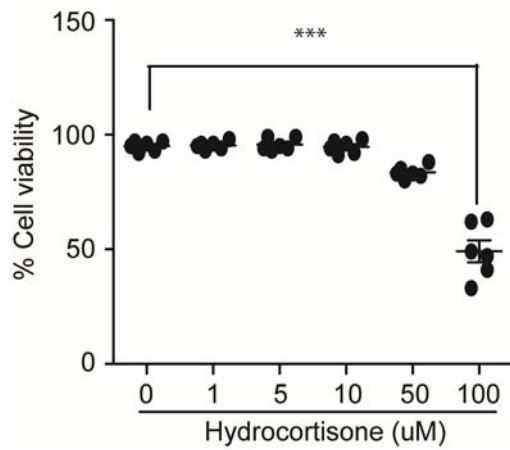

**Figure S3. Toxicity of high dose hydrocortisone to SH-SY5Y cells.**

Viability of SH-SY5Y cells treated with indicated dose of hydrocortisone was determined by trypan blue exclusion assay ( $n = 6$  per group). Quantified data are expressed as mean  $\pm$  s.e.m.

\*\*\* $P < 0.001$ , ANOVA test followed by Tukey *post hoc* analysis.

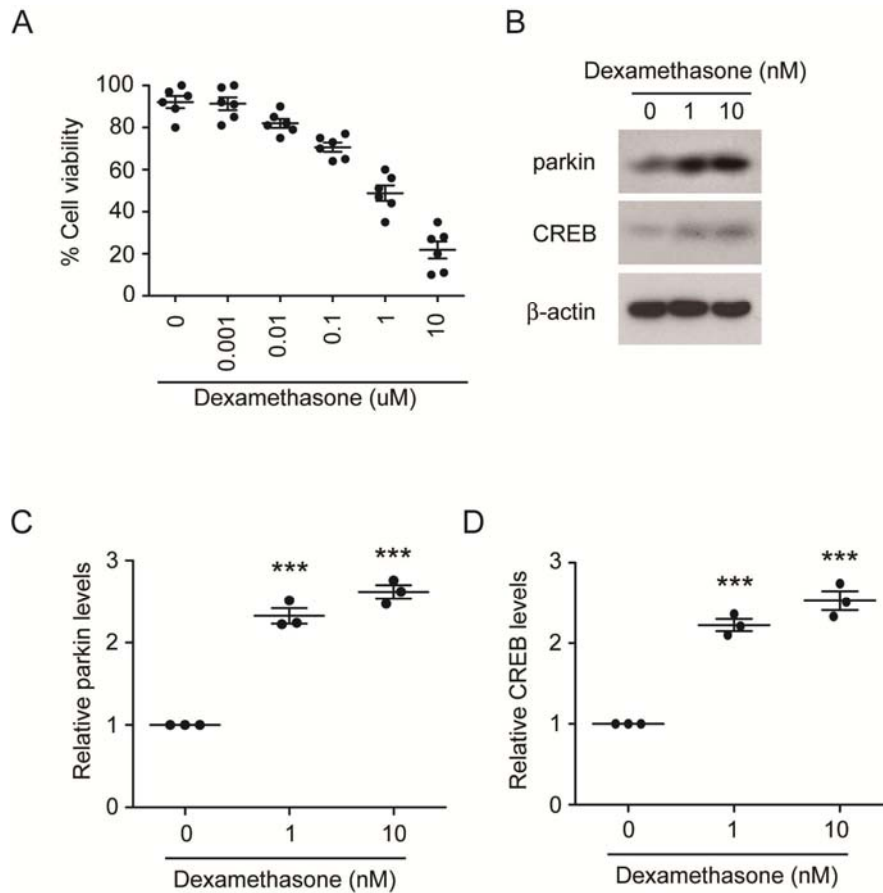

**Figure S4. Dexamethasone increases CREB/parkin expression.**

(A) Viability of SH-SY5Y cells treated with indicated dose of dexamethasone was determined by trypan blue exclusion assay ( $n = 6$  per group). (B) Induction of parkin and CREB expression by dexamethasone treatment (0, 1, 10 nM, 24 hrs in SH-SY5Y cells) determined by western blots. (C) Relative parkin expression levels in SH-SY5Y cells treated with dexamethasone (0, 1, 10 nM, 24 hrs) were normalized to  $\beta$ -actin ( $n = 3$ ). (D) Relative CREB expression levels in SH-SY5Y cells treated with dexamethasone (0, 1, 10 nM, 24 hrs) were normalized to  $\beta$ -actin ( $n = 3$ ). Quantified data are expressed as mean  $\pm$  s.e.m. \*\*\* $P < 0.001$ , ANOVA test followed by Tukey *post hoc* analysis (C, D).

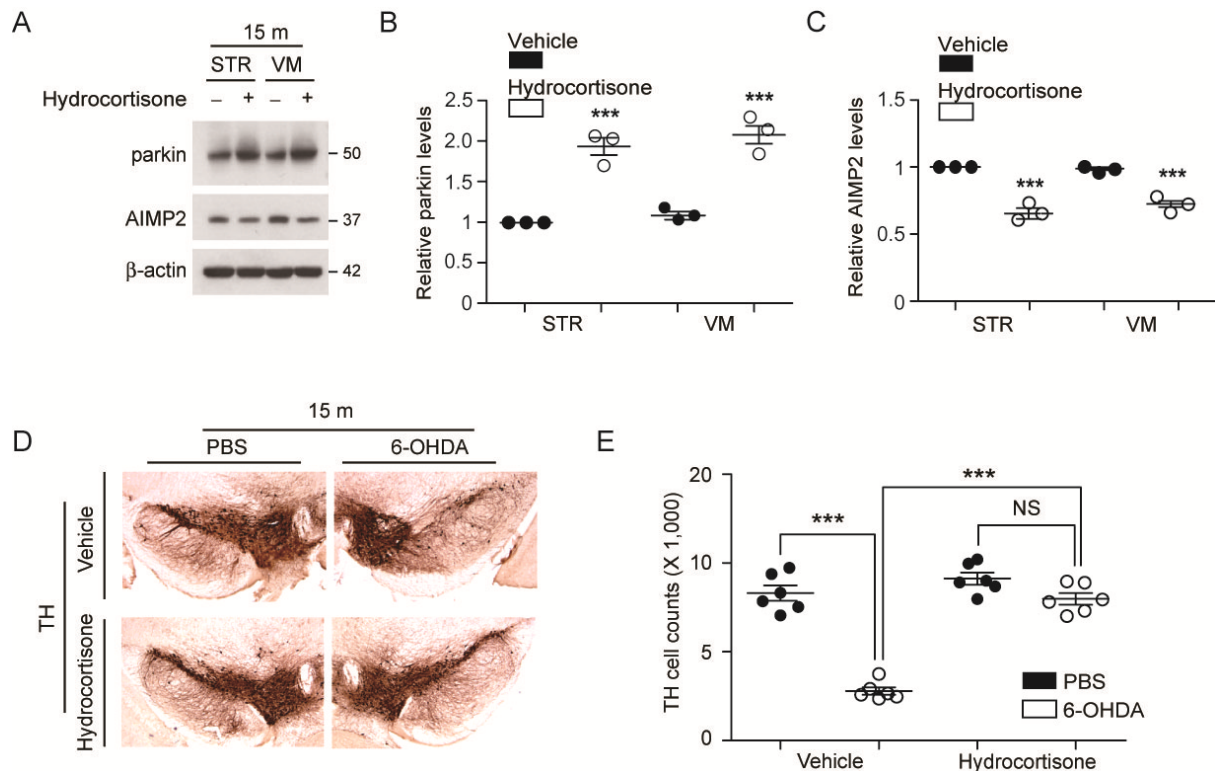

**Figure S5. Hydrocortisone prevents dopamine cell loss in 15-month-old mouse models of 6-OHDA injection.**

(A, B, C) Western blot analysis of parkin and its substrate AIMP2 in the striatum and ventral midbrain regions of mice (15 months old) treated with hydrocortisone or DMSO for 7 days. Relative parkin or AIMP2 protein levels were normalized to that of  $\beta$ -actin and shown as plot graphs ( $n = 3$  mice per group). (D) Representative tyrosine hydroxylase (TH) immunohistochemistry of the substantia nigra of 6-OHDA PD mouse models (15 months old) treated with hydrocortisone or DMSO. 6-OHDA (8  $\mu$ g) was stereotaxically injected into the striatum (coordinate from bregma, L: -2.0, AP: 0.5, DV: -3.0 mm) to model dopaminergic neurodegeneration in mice. (E) Stereological assessment of tyrosine hydroxylase (TH)-positive dopaminergic neurons in the substantia nigra pars compacta of injection sides from the indicated mouse groups ( $n = 6$  injection sides per group. Total 12 mice were used for this study. PBS injection into the left striatum and 6-OHDA injection into the right striatum). Quantified data are expressed as mean  $\pm$  s.e.m. \*\*\* $P < 0.001$ , unpaired two-tailed Student's  $t$

test (B, C) and ANOVA test followed by Tukey *post hoc* analysis (E).

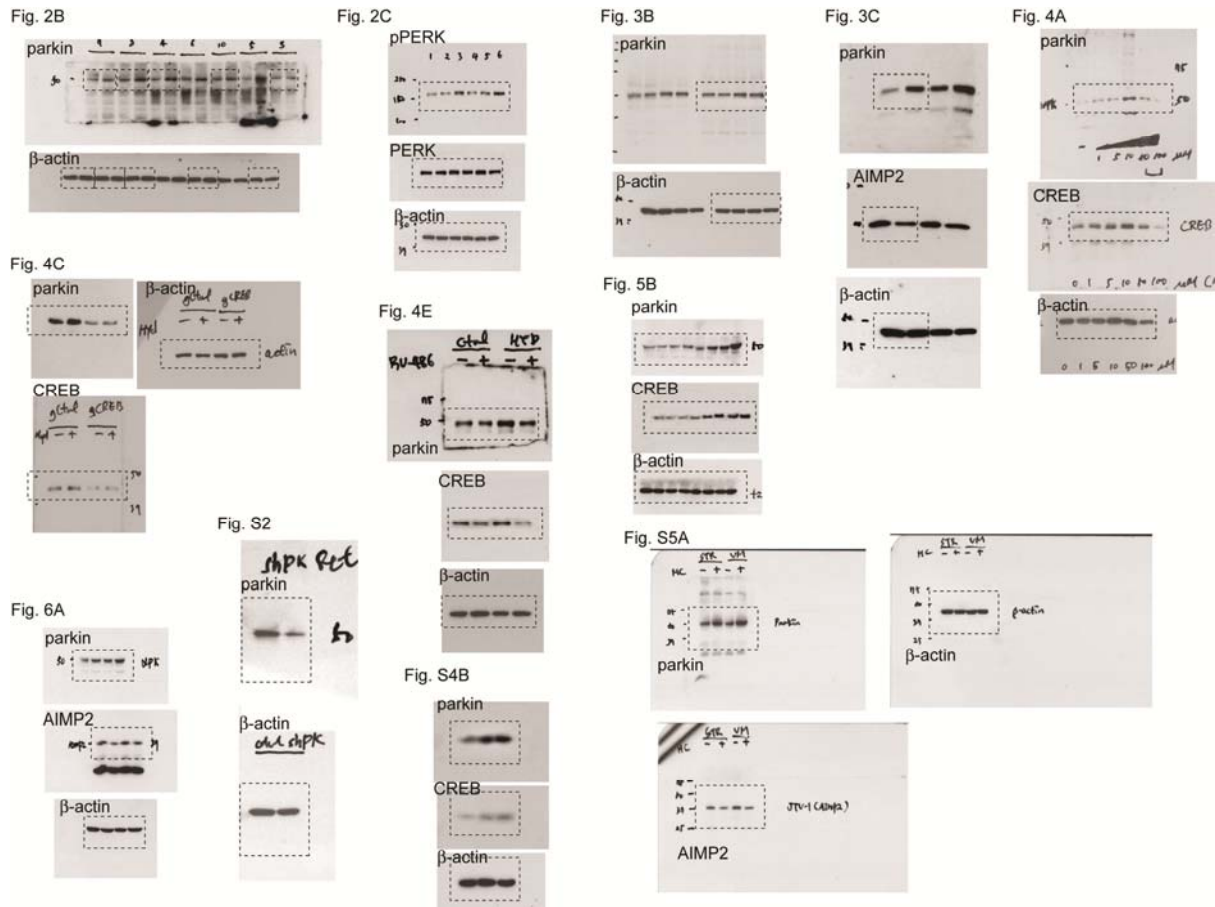

**Figure S6. Full blot images of scanned western blots.** Cropped regions used in figures are indicated with box with dotted lines. Each full blots are labeled to indicate the corresponding figure, panel and antibodies.
